# A harbour seal (*Phoca vitulina*) can learn geometrical relations between landmarks

Eric Maaß<sup>1</sup>, Lars Miersch<sup>1</sup>, Gerit Pfuhl<sup>2</sup> & Frederike D. Hanke<sup>1,\*</sup>

<sup>1</sup>University of Rostock, Institute for Biosciences, Neuroethology, Albert-Einstein-Str. 3, 18059 Rostock, Germany

<sup>2</sup>Norwegian University of Science and Technology, Postbox 8900 Torgarden, 7491 Trondheim, Norway

\*Author of correspondence

Phone +49 381 666 97 19 14

Fax +49 381 666 97 19 35

frederike.hanke@uni-rostock.de

ORCID [orcid.org/0000\\_0002\\_1737\\_3861](https://orcid.org/0000_0002_1737_3861)

## Significance statement

A harbour seal can localise a goal in respect to landmarks using geometrical relations which is beneficial when approaching landmarks from a distance or from positions the animal has never been before.

Keywords: spatial strategies, navigation, rule-based searching, cognitive map, pinnipeds

## Abstract

Marine mammals travel the world's oceans. Some species regularly return to specific places to breathe, haul-out or breed. However, the mechanisms they use to return are unknown. Theoretically, landmarks could mediate the localisation of these places. Occasionally, it might be beneficial or even required to localise places using geometrical information provided by landmarks such as to apply a 'middle rule'. Here, we trained a harbour seal to find its goal in the middle of numerous vertically and horizontally orientated two-landmark arrays. During testing, the seal was confronted with unfamiliar two-landmark arrays. After having successfully learnt to respond to the midpoint of multiple two-landmark arrays, the seal directly and consistently followed a 'middle rule' during testing. It chose the midpoint of the two-landmark arrays with high precision. Harbour seals with the ability to

localise goals based on geometrical information would be able to home in on places even from unknown positions relative to goal-defining features. Altogether, the results obtained with our harbour seal individual in the current and previous study, examining the basis of landmark orientation, provide evidence that this seal can use landmark information very flexibly. Depending on context, this flexibility is adaptive to an environment in which the information content can vary over time.

## Introduction

Many animals are guided to, for example, their nests or burrows by landmarks (Healy 1998). Generally, a landmark is defined as an object or stimulus that is contrasting from the background or is prominent in it and that is used for navigation and orientation (Lynch 1960). Landmarks might also guide marine mammals when revisiting certain feeding areas, breeding grounds or, in amphibiously living species, haul-out places (Liebsch 2006). In the first approach to marine mammal landmark orientation (Maaß and Hanke 2022), we tested how harbour seals encode goals in respect to landmarks in a transformational approach – the expansion test. In an expansion test, the subjects are first trained to find a goal inside or in relation to a landmark array (see e.g., Cheng and Spetch 1998). After accurately locating the goal, the array was expanded, meaning the distances and/or the geometrical relationship between the landmarks were altered. The subsequent analysis then focussed on the subject's search behaviour and how it was altered by the experimental manipulations. When exposing harbour seals to an expanded four-landmark array, the seals indicated the position of the goal at the specific angle and distance of goal to landmark as experienced during training, they applied a directional vector strategy for goal localisation (see Supplement Fig. 1 for the visualization of the different goal localisation strategies). In the second part of the experiment with a two-landmark array, the search behaviour of one of the three seals additionally suggested the use of landmarks as beacons, which resulted in an undirected search in the vicinity of a landmark. However, the seals never searched configurationally, which would have resulted in a search behaviour in line with an underlying rule such as “the goal is in the middle of the landmarks”, or “the goal completes a triangle”.

The findings obtained in harbour seals are consistent with the search behaviour of various organisms tested in expansion tests (Collett, Cartwright et al. 1986, Spetch, Cheng et al. 1996, Spetch, Cheng et al. 1997, Potì, Bartolommei et al. 2005, Kelly, Kippenbrock et al. 2008, Potì, Kanngiesser et al. 2010). Here, mostly the directional vector and beacon strategy were spontaneously chosen when animals were tested in single goal-landmark relationships as experienced by our harbour seals. Only humans were spontaneously, meaning without prior training, and consistently adopting a configurational or rule-based approach (Spetch, Cheng et al. 1996, Spetch, Cheng et al. 1997, MacDonald, Spetch et al. 2004). However, this midpoint encoding only emerged later during child development, and the researchers hypothesized that the advent of adopting a middle-rule correlates with the knowledge of the corresponding spatial wording (Simms and Gentner 2019). Yet even though

humans use this type of landmark encoding after reaching a certain age ad hoc, individuals of some animal species have demonstrated the use of relational information in experiments conducted with multiple goal-landmark relationships (Kamil and Jones 1997, Kamil and Jones 2000, Jones, Antoniadis et al. 2002, Spetch, Rust et al. 2003, Potì, Bartolommei et al. 2005, Sturz and Katz 2009). Thus, it appears that the encoding of landmarks is context-dependent.

Context-dependent search behaviour, or more generally the flexibility to apply all three possible goal localisation strategies, would be highly advantageous for harbour seals or for marine mammals in general. A directional vector and a beacon strategy allow localising a goal with respect to familiar landmarks that can be individually identified, for example, on the basis of feature information. However, if these features cannot be resolved from a distance or are not stable over time, rule-based searching would be more effective for goal localisation. The ability to use relational information from familiar landmarks would enable a harbour seal to localise a goal even from places it has never been before. More generally, behavioural flexibility is essential for species living in complex environments, such as for marine mammals, which might require the organisms to adapt quickly to changing conditions or simply to different circumstances (Robinson 1985, Kamil and Mauldin 1988, Jones 2006, Nowak and Lee 2013). To investigate the degree of flexibility underlying goal localisation based on landmarks, we assessed whether a harbour seal would start to show rule-based searching with multiple goal-landmark relationships that triggered the use of relational goal searching in other species.

## Material & Methods

### Experimental Animal

The experiment was conducted with one adult male harbour seal (*Phoca vitulina*) named "Moe" (14 years old) at the Marine Science Center of the University of Rostock, Germany. The seal had already participated in the previous experiment on landmark encoding (Maaß and Hanke 2022). The setup of the previous experiment was also used in the current study, thus the seal was already familiar with the setup. The seal was housed with 11 other harbour seals, two sub-adult California sea lions (*Zalophus californianus*), and an adult South African fur seal (*Arctocephalus pusillus*) in a seawater enclosure. The seal was mainly fed freshly thawed cut herring (*Clupea harengus*) and sprats (*Sprattus sprattus*). During the experiment and the general training, the animals received 1-5 kg of fish a day depending on season and motivation; with experiments running three to four days a week. The experiments carried out in this study were in accordance with the European Communities Council Directive of September 22<sup>nd</sup>, 2010, (2010/63/EU) and the German Animal Welfare Act of 2006. The individual involved in the study was not subject to pain, suffering or injury therefore no approval or notification was required.

## Experimental Setup

The experiment took place in a small enclosure of the large facility. Here, a 2 m x 2 m integral foam panel (Fig. 1) was fully submerged with the upper frame 20 cm below the water surface. 121 LED lights (Luckylight, Shenzhen, China Ø 10 mm; 8000 mcd, cold-white, radiation angle 20 deg), arranged in 11 columns and rows, were embedded in the panel. The LEDs were 15 cm apart from each other; the outermost LEDs were 25 cm apart from the aluminium frame surrounding the wall. Each LED was connected to a control panel installed at a distance of 5 m to the wall. In order to control the LEDs from afar, the control panel served as a miniature version of the LED-panel equipped with 22 light-switches. Three cameras (2x Eyoyo 1000 TVL Waterproof Camera; Eyoyo Shenzhen, Guangdong, China & 1x GoPro Hero 7 Black Edition; GoPro San Mateo, CA, USA) on aluminium mountings were used to observe and document the animal's behaviour. To prevent secondary cueing, the experimenter hid behind an opaque visual cover.

## Stimuli

The stimuli presented were LED landmark arrays consisting of two lit LEDs (Fig. 1). For each trial, the LED array configuration was varied in its absolute position on the LED wall following a pre-set schedule. In order to systematically and evenly vary the position of the LED array over the entire LED wall, we divided the wall into four quadrants and an overlapping area (Fig. 1A). During a session, the LED array was placed four (during testing) or up to six times (in training) in each quadrant and the overlapping area resulting in a session of 20 to 32 trials.

During training, four different landmark configurations were shown to the seal either separately (stages 1–4) or several combined in one session (stages 5–7) thereby increasing the complexity of the task continuously as preparation for the testing phase with sessions which ultimately included a multitude of LED landmark arrays (see below). The suite of landmark configurations for the different stages (Tab. 1) was chosen to make the seal familiar with LED landmarks with various inter-landmark distances as well as two orientations of the LED landmark array. Altogether, we used all horizontal and vertical two-LED landmark array configurations that were possible to present on our 11 LED x 11 LED panel with some variation in absolute position on the board (Fig. 1).

First, two LEDs, serving as landmarks, were shown that were spaced 60 cm apart and aligned vertically (Fig. 1A; 3LEDv, stage 1). Second, we presented two landmarks 90 cm apart from each other, also aligned vertically (Fig. 1B; 5LEDv, stage 2). Third, the configuration of stage 1 but with the LEDs aligned horizontally (3LEDh, stage 3) was shown to the seal. Fourth, we presented the landmarks with a distance of 120 cm from each other (7LEDh, stage 4) and with horizontal orientation. After stage 4, a session was composed of 3LEDh and 7LEDh in stage 5, of 3LEDh, 7LEDh and 3LEDv in stage 6, and of all four two-LED arrays used in stages 1–4 combined in one session in stage 7.

In the test trials, a two-LED landmark array with the LEDs aligned either horizontally or vertically and being 30 cm (1LEDv & 1LEDh) or 150 cm (9LEDv & 9LEDh) apart from each other was shown to the seal. The inclusion of new inter-landmark distances in the test trials smaller and bigger as the distances used in the training phase as well as in the baseline trials served to evaluate whether the seal's search behaviour fulfilled the requirements of "geometric rule"-learning in accordance with Kamil and Jones (2000). We also introduced two variants of the familiar two-LED landmark arrays 5LEDv and 7LEDh by rotating the arrays by 90 deg, thus 5LEDh and 7LEDv, to increase the number of test trials. Testing resumed until each test stimulus was presented eight or nine times.

### Experimental Procedure

At the beginning of the trial, the animal was resting in a ring station opposite the LED panel. After the experimenter had switched on the specific two-LED landmark array of the respective trial, the seal was indicated to leave its station by a short whistle and approached the wall. At the wall (Fig. 1B), the seal had to put its snout at the position, where it assumed the goal. The seal was required to touch the goal location in the middle of the LEDs with its snout. An incorrect answer was defined, as the seal stationing elsewhere on the LED wall. After every correct response, the animal received a food reward. An incorrect response was followed by the German word for no, "nein", and no reward was given. After the feedback, the animal had to swim back to its station for the next trial to start.

When presented with one (stages 1–4), two (stage 5) or three (stage 6) two-LED landmark arrays, a session consisted of 20–30 trials, whereas with four two-LED landmark arrays (stage 7), the number of trials was increased to 32 trials allowing the presentation of arrays in the different areas of the panel with equal percentage as done in the previous stages. Every stage of training was concluded when the animal reached the learning criterion set to a performance of  $\geq 80\%$  correct responses to be reached in two consecutive sessions.

In the subsequent testing phase, a session was composed of 20 baseline and two test trials. The test trials were randomly integrated into the sessions, but never as first or last trial. In the baseline trials, the trials followed the schedule as for phase 7 of training and thus consisted of all four two-LED landmark arrays that had been used during training again presented in pseudorandomised order and equally distributed among the quadrants and the overlapping area.

### Data Analysis

We analysed the performance of the seal during the training and testing phase (Tab. 1). During all trials, we noted whether the seal was giving a response at the midpoint (C "correct") or not (IC "incorrect"). Throughout the test trials, the position, meaning the LED on the panel the seal was stationing at when giving its response was documented. If the seal was deviating from the middle of

the landmark array, we described the deviations as the number of LEDs from the midpoint (1) in linear, the error in distance along the line connecting the two LEDs of the landmark array, and (2) in orthogonal direction, when the seal's responses occurred on the line(s) above or below (horizontal configurations) or on the line(s) to the left or right (vertical configurations) of the midpoint of the landmark array. These errors could be negative (e. g. when answering to the left of the midpoint regarding the linear error and below the midpoint regarding the orthogonal error for horizontal configurations), as well as positive (e. g. when answering to the right of the midpoint regarding the linear error and above the midpoint regarding the orthogonal error for horizontal configurations).

The seal's performance in the testing phase was statistically analysed to test whether the seal's performance in the first test trials with all fully or partially novel configurations taken together deviated significantly from chance performance (binomial test). For this first-trial analysis, we defined a lower and upper chance level (see also Spetch, Cheng et al. 1996). The lower chance level was 1 in 121 or 0.83% as the seal could have answered at any of the 121 LEDs of the LED panel. As upper chance level, we used the error rate of the seal during the last training phase (the seal made 18 errors within 84 trials corresponding to 21.43%). A performance significantly different from chance level in all six first trials of the testing phase together was considered evidence for the seal responding in line with a middle rule.

We assessed whether the performance in all 50 test trials and the 520 baseline trials was similar or significantly different to the seal's performance in stage 7 of the training phase ( $\chi^2$  tests). Analysing the baseline trials was done to evaluate the motivation of the animal to cooperate during the testing phase. A comparably high motivation of the seal in the testing phase versus stage 7 needed to be documented as prerequisite for analysing the test trials.

Additionally, we analysed whether the seal's performance differed significantly between test conditions (binomial generalised linear model (GLM)). For this statistical calculation, the seal's performance in the 50 test trials was coded in binary form as either correct (C) or incorrect (IC). We ran an analysis using the following fixed factors: orientation (horizontal versus vertical landmark configurations), inter-landmark distance (four-level factor: 1LED, 5LEDs, 7LEDs, or 9LEDs), degree of novelty of LED landmark configuration (fully versus partially novel LED landmark configurations) and the two-way interaction between inter-landmark distance and orientation (see Supplement Tab. 2 for model comparison).

Finally, we analysed whether the absolute size of the error (Kamil and Jones, 2000) differed significantly by the type of error (linear or orthogonal), inter-landmark distance and orientation using a repeated measures analysis of variance (GLM). For all analyses, we used JASP (JASP Team 2020, Version 0.14.1, University of Amsterdam, Amsterdam, The Netherlands).

## Results

During training, the seal learnt to respond to the middle of four two-LED landmark arrays in 84 - 467 trials, with only 84 trials to criterion in the last stage of training (Tab. 1, Fig. 2). However, throughout the training phase, the seal did not direct its response to the midpoint of the two-LED landmark array in the first trials after the introduction of new two-LED landmark array configurations in stages 1 to 4. Thus, the animal did not show a positive transfer between consecutive new configurations. Even upon reintroduction of configurations in stage 5-7 (Tab. 1), the first trial of the seal was only directed at the midpoint for two of the three configurations.

In the testing phase, Moe chose the midpoint between the two landmarks in all first trials of presentation of the six two-LED landmark array configurations (Tab. 1, Supplement Tab. 1). The first trial analysis revealed that the seals' performance of 100% correct in all six first trials of the testing phase was significantly better than chance level (binomial test:  $p < 0.001$ ; for chance level 0.83% and 21.43%,  $N = 6$ ). Having a look at the seal's performance in the entire testing phase, the animal responded at the midpoint between the two landmarks in 76 % of all test trials (12 ICs, 38 Cs, Supplement Tab. 1). This was similar to its performance in stage 7 of the training phase ( $\chi^2 = 0.12$ ,  $p = 0.73$ ). In 24% of the test trials, the seal made errors, that were all distributed in close proximity (-1 to +2 LEDs) to the midpoint (Fig. 3, Supplement Tab. 1, Supplement Fig. 2). The seal either made small linear or orthogonal errors in 14% and 10% of the test trials, respectively, but it never deviated from the midpoint linearly and orthogonally in one trial. Accordingly, the seal's search behaviour was consistent with a relational "middle" strategy or rule-based searching. During the testing phase, the seal kept on performing the baseline trials with high accuracy by answering at the midpoint in 89% of all baseline trials in the testing phase and was performing significantly better than in stage 7 of the training phase ( $\chi^2 = 7.29$ ;  $p = 0.007$ ), indicating that the seal showed a high degree of cooperation.

Detailed analysis of the test trials revealed (binomial GLM,  $\chi^2(45) = 4.759$ ,  $p > 0.05$ , McFadden  $R^2 = 0.09$ ; Supplement Tab. 2, Supplement Fig. 2) that, in the testing phase, the performance of the seal was not related to any feature of the configuration. In detail: the seal's performance was not significantly different when comparing its performance across inter-landmark distances ( $z = -1.13$ ,  $p = 0.26$ , 75% for 1LED and 7LEDs, 89% for 5LEDs, 71% for 9LEDs) or across orientations ( $z = -1.23$ ,  $p = 0.22$ , 80% for horizontal and 73% for vertical LED landmark arrays). In addition, the interaction between orientation and inter-landmark distance was not significant ( $z = 1.78$ ,  $p = 0.07$ ). The performance was not significantly different regarding the LED landmark configurations with different degree of novelty ( $z = -0.79$ ,  $p = 0.43$ , 73% for fully novel and 82% for partially novel LED landmark configurations). In this context, it needs to be noted, and discussed, that, with stage 6, the seal rotated its body axis by 90 deg, when approaching vertical configurations.

Notably, for the absolute size of the error, we found that there was a statistically significant interaction between type of error and inter-landmark distance (interaction effect:  $F(1, 47) = 9.27$ ,  $p < 0.01$ ,  $\eta^2 = 0.08$ ): e. g., in the 9LED configuration the animal made larger linear than orthogonal errors

whereas the reverse was true for the 1LED configuration. There was no interaction between type of error and orientation ( $F(1,47) = 2.04$ ,  $p = 0.16$ ,  $\eta^2 = 0.02$ ). None of the main effects of the GLM was significant (Supplement Tab. 3).

## Discussion

In the present experiment, the seal directly, i.e., in the first trials, responded at the midpoint between two landmarks during the testing phase. It showed midpoint-responding when confronted with two-LED landmark arrays with unfamiliar inter-landmark distances in two orientations (fully novel configurations), and even with inter-landmark distances outside the range presented in the training phase. The seal also instantly showed responses to the midpoint in test trials which included LED landmark arrays with inter-landmark distances known from training, that were however presented with changed orientation (partially novel configurations). Taken all test trials together, the seal kept on responding at the midpoint of all LED landmark arrays with a high performance, irrespective if experiencing fully or partially novel LED landmark arrays. The seal's behaviour was thus in line with a relational middle rule or rule-based searching (Kamil and Jones 2000).

The seal's responses at the midpoint supporting the application of a middle rule generally required two processes to have taken place: the animal needed to determine (1) the line connecting the two landmarks, a directional problem, and then (2) the midpoint between the landmarks on that line, a distance problem (Kamil and Jones 1997). In accordance, the seal might have also applied both processes when confronted with the 1LED configurations in the testing phase. However, its behaviour as response to the 1LED configurations could also be explained on the basis of the first process only as, after determining the line between the landmarks, the seal had only one LED between the landmarks left to answer to; in line the seal did not make linear errors when presented with this configuration (Fig. 4). We consider it most likely that the seal used a middle-rule throughout the testing phase due to its overall high accuracy of responding to the midpoint, even when it was confronted with configurations that required it to be more decisive than the 1LED configuration. In a future experiment, the seal's performance could be further characterized with an experimental setup allowing a continuum of responses between the landmarks, which would make a determination of the precision of responding at the midpoint and of distance judgment even with short distances between landmarks possible.

In general, the seal's directional judgments were very accurate. When analysing the errors made by the seal in the testing phase, it made more linear than orthogonal errors the larger the inter-landmark distance whereas the reverse was true for smaller inter-landmark distances. This overall finding hints at distance and direction being judged independently as it was also assumed for Clark's nutcrackers (Kamil and Jones 1997, Kamil and Jones 2000). The "largest" directional problem that the



seal needed to solve was to assess the orientation, vertical versus horizontal, of the landmark array. It solved this directional problem with ease and even without any significant difference in performance regarding configurations with horizontal or vertical orientation. Most likely the comparable performance resulted from or was at least supported by the body rotations the seal showed when confronted with vertical configurations from training stage 6 on. By these body rotations, the seal transformed a vertical into a horizontal configuration, which it might have figured out by chance, or by mentally rotating the configurations, an aspect that was investigated in a California sea lion (Mauck and Dehnhardt 1997, Stich, Dehnhardt et al. 2003). The seal might have shown this rotatory behaviour due to specific characteristics of the eye. On the harbour seal's retina, a horizontal visual streak with an increased ganglion cell density can be found in addition to an area centralis (Hanke, Peichl et al. 2009). The visual streak provides the seal with a horizontal axis of high resolution, and it was previously speculated that it might be used to sample events taking place at the sea floor or at the water surface, which are strong horizontal reference planes in the habitat of seals, with high accuracy. The body rotations shown by our experimental animal in our study might have served to align the eye's axis of best resolution, the horizontal, with the two-LED landmark array. Thus, the seal might have optimized visual resolution by using the degrees of freedom of body rotations available to it underwater. As they regularly change their body orientation underwater, they might perceive objects from different perspectives which could ultimately lead to a different organization of visual perception, as already proposed by Schusterman and Thomas (1966), and consequently in solutions of directional problems different from terrestrial animals.

The seal's rotatory behaviour could also hint at the mechanism underlying its responses at the midpoint of the LED landmark array. To assess the midpoint, the seal might have balanced the input from the two landmarks to both eyes, which would have ultimately led it to the midpoint. In order to use the equal forces to both eyes for vertical LED landmark array, rotating the body is a prerequisite. The mechanism of midpoint-responding needs to be addressed in future experiments.

While the seal answered in line with a relational middle-rule in the testing phase, the seal did not directly swim to the midpoint between the landmarks in the first trial of a new landmark configuration in the training phase. Thus, it seemed that the seal had to learn to respond to the midpoint for every new landmark configuration in the training phase, even though the animal showed that it was capable of finding the midpoint in the first trials of re-introduced configurations in stage 5 and 6. Possibly the seal discovered the underlying principle "respond to the middle" during stage 7 in which four configurations were presented and in which the seal reached the learning criterion within only 84 trials. It then continued to apply the middle rule to every configuration in the testing phase. Thus, only after training with several configurations, albeit only four configurations, including multiple goal-landmark distances the seal used configurational information for goal localisation, which would make its behaviour in these tasks comparable to Clark's nutcrackers (Kamil and Jones 2000). The transition from stimulus-specific responses shown during early training to finally responding in line with an underlying principle, such as "respond at the midpoint" or "same versus different" has been shown in previous cognitive experiments with harbour seals (see e.g., Mauck, and

Dehnhardt 2005 or Scholtyssek, Kelber, et al. 2013). However, acquisition of midpoint-responding for the first configurations was much faster in our study than in the previous seal cognitive experiments, most likely as the seal had already gained some experience with the setup and LED landmark arrays in our previous study (Maaß and Hanke 2022), and in other species trained in comparable tasks (Marsh, Spetch et al. 2011).

Taking the results of the previous expansion test and the current experiment into account, the findings obtained in three harbour seal individuals might indicate that seals can apply all three strategies for goal localisation depending on context (Maaß and Hanke 2022). This putative flexibility seems adaptive for seals, and also for other species, that revealed a shift between strategies depending on experimental paradigm (for Clark's nutcrackers see Kamil and Jones 1997 and Kelly, Kippenbrock et al. 2008, for pigeons see Spetch, Cheng et al. 1997 and Spetch, Rust et al. 2003 and for primates see Potì, Bartolommei et al. 2005 and Potì, Kanngiesser et al. 2010), as it would allow them to choose appropriate/adequate solutions quickly and dynamically. Generally, it needs to be stressed that cognitive/behavioural flexibility allows adaptations in real-time, which is an important aspect to consider even in the face of climate change or when assessing the impact of anthropogenic interventions in the ocean, the habitat of marine mammals. Behavioural flexibility has previously been addressed in harbour seals in reversal learning experiments (Erdsack et al. 2022, Niesterok et al. 2022). While they successfully reversed a spatial task, only one out of four seals solved a serial visual reversal learning experiment. The flexibility with which seals generally respond to spatial information as well as their generally good access to visuo-spatial information (Renouf and Gaborko 1989, Mauck and Dehnhardt 2007, Maaß and Hanke 2021) seems highly adaptive in a species navigating the open ocean and being a central place forager.

With our two studies on goal localisation (Maaß and Hanke 2022) with respect to small and artificial landmarks presented on a board with restricted size, we could gain first insight into how seals, the experimental animal of this study and two additional seal individuals in the previous study, use goal-defining features for goal localisation. Future experiments could document the goal localisation behaviour of harbour seals in respect to naturally occurring and larger landmarks in a large-scale orientation task. These experiments would be the basis for understanding landmark orientation/navigation in wild pinnipeds which has previously been speculated about in studies that analysed the movements of wild seals, grey seals and Weddell seals in their habitat (Matsumura, Watanabe et al. 2011, Chevaillier, Karpytchev et al. 2014, Fuiman, Williams et al. 2020). Although, to our knowledge, landmark orientation/navigation has not been referred to regarding wild harbour seals, it seems very likely that harbour seals, often staying close to the shore, use landmarks for many reasons, such as the localisation of haul-out places. A configurational use of landmarks, if also shown in future experiments as just described, might be particularly useful when distant landmarks are the only goal-defining elements available as has already been suggested for nutcrackers (Kamil and Jones 2000). It might even allow the animals to find their goal from positions they had never been before, also called non-route-based familiar landmark navigation by Bingman (1998) which would also need to be shown in a future experiment. This type of landmark navigation would be in

line with spatial information being represented in form of a cognitive map (Tolman 1948, Gallistel 1990, Gallistel and Cramer 1996), an aspect that has also not been investigated in a marine mammal before.

#### Funding

The study was financially supported by a grant of the Deutsche Bundesstiftung Umwelt to EM and of the Volkswagen Foundation to FH.

#### Data availability

The original data files and videos can be found at <https://osf.io/54vfa/>.

#### Literature

Bingman, V. P. (1998). Spatial representations and homing pigeon navigation. *Spatial Representation in Animals*. S. Healy. New York, Oxford University Press: 69–85.

Cheng, K. and M. L. Spetch (1998). Mechanisms of landmark use in mammals and birds. *Spatial Representation in Animals*. S. Healy. New York, Oxford University Press: 1–17.

Chevaillier, D., et al. (2014). "Can gray seals maintain heading within areas of high tidal current? Preliminary results from numerical modeling and GPS observations." *Marine Mammal Science* 30(1): 374–380. (DOI : 10.1111/mms.12024)

Collett, T., et al. (1986). "Landmark learning and visuo-spatial memories in gerbils." *Journal of Comparative Physiology A* 158(6): 835–851. (<https://doi.org/10.1007/BF01324825>)

Erdsack, N., et al. (2022). "Serial visual reversal learning in harbor seals (*Phoca vitulina*)." *Animal Cognition* (<https://doi:10.1007/s10071-022-01653-1>)

Fuiman, L. A., et al. (2020). "Homing tactics of Weddell seals in the Antarctic fast-ice environment." *Marine Biology* 167(8): 1–16. (<https://doi.org/10.1007/s00227-020-03730-w>)

Gallistel, C. R. (1990). *The Organization of Learning*, Cambridge, Massachusetts, The MIT Press.

Gallistel, C. R. and A. E. Cramer (1996). "Computations on Metric Maps in Mammals: Getting Orientated and Choosing a Multi-Destination Route." *Journal of Experimental Biology* 199(211–217). (<https://doi.org/10.1242/jeb.199.1.211>)

Hanke, F. D., et al. (2009). "Retinal ganglion cell topography in juvenile harbor seals (*Phoca vitulina*)." *Brain, Behavior and Evolution* 74(2): 102–109. (<https://doi.org/10.1159/000235612>)

Healy, S. E. (1998). Spatial representation in animals. Oxford University Press.

Jones, C. (2006). Behavioral Flexibility in Primates: Causes and Consequences, Boston, Springer Science & Business Media.

Jones, J. E., et al. (2002). "A comparative study of geometric rule learning by nutcrackers (*Nucifraga columbiana*), pigeons (*Columba livia*) and jackdaws (*Corvus monedula*)." Journal of Comparative Psychology 116(4): 350. (<https://doi.org/10.1037/0735-7036.116.4.350>)

Kamil, A. C. and J. E. Jones (1997). "The seed-storing corvid Clark's nutcracker learns geometric relationships among landmarks." Nature 390(6657): 276-279. (<https://doi.org/10.1038/36840>)

Kamil, A. C. and J. E. Jones (2000). "Geometric rule learning by Clark's nutcrackers (*Nucifraga columbiana*)." Journal of Experimental Psychology: Animal Behavior Processes 26(4): 439-453. (<https://doi.org/10.1037/0097-7403.26.4.439>)

Kamil, A. C. and J. E. Mauldin (1988). "A comparative-ecological approach to the study of learning." Evolution and Learning. R. C. Bolles & M. D. Beecher. Hillsdale, NJ. Lawrence Erlbaum Assoc.: 117-133.

Kelly, D. M., et al. (2008). "Use of a geometric rule or absolute vectors: Landmark use by Clark's nutcrackers (*Nucifraga columbiana*)." Brain research bulletin 76(3): 293-299. (<https://doi.org/10.1016/j.brainresbull.2008.02.008>)

Liebsch, N. S. (2006). Hankering back to ancestral pasts: constraints on two pinnipeds, *Phoca vitulina* & *Leptonychotes weddellii* foraging from a central place, Ph.D-Thesis, Christian-Albrechts Universität Kiel.

Lynch, K. (1960). The image of the environment. The image of the city, 11, 1-13.

Maaß, E. and F. D. Hanke (2021). "Distance Estimation in Reproduction Tasks in a Harbor Seal (*Phoca vitulina*)." Water 13(7): 938. (<https://doi.org/10.3390/w13070938>)

Maaß, E. and F. D. Hanke (2022). "How harbour seals (*Phoca vitulina*) encode goals relative to landmarks." Journal of Experimental Biology 225(5). (<https://doi.org/10.1242/jeb.243870>)

MacDonald, S. E., et al. (2004). "Strategies in landmark use by children, adults, and marmoset monkeys." Learning and Motivation 35(4): 322-347. (<https://doi.org/10.1016/j.lmot.2004.03.002>)

Marsh, H. L., et al. (2011). "Strategies in landmark use by orangutans and human children." Animal Cognition 14(4): 487-502. (<https://doi.org/10.1007/s10071-011-0382-9>)

Matsumura, M., et al. (2011). "Underwater and surface behavior of homing juvenile northern elephant seals." Journal of Experimental Biology 214(4): 629-636. (<https://doi.org/10.1242/jeb.048827>)

Mauck, B. and G. Dehnhardt (1997). "Mental rotation in a California sea lion (*Zalophus californianus*)." Journal of Experimental Biology 200(9): 1309-1316. (<https://doi.org/10.1242/jeb.200.9.1309>)

Mauck, B. and G. Dehnhardt (2005). "Identity concept formation during visual multiple-choice matching in a harbor seal (*Phoca vitulina*)." *Learning and Behavior* 33(4): 428-436. (<https://doi.org/10.3758/bf03193181>)

Mauck, B. and G. Dehnhardt (2007). "Spatial multiple-choice matching in a harbour seal (*Phoca vitulina*): differential encoding of landscape versus local feature information?" *Animal Cognition* 10(4): 397-405. (<https://doi.org/10.1007/s10071-007-0074-7>)

Niesterok, B., et al. (2022). "Well-developed spatial reversal learning abilities in harbor seals (*Phoca vitulina*)." *Animal Cognition* (<https://doi.org/10.1007/s10071-022-01651-3>)

Nowak, K. and Lee, P. C. (2013). "Specialist" primates can be flexible in response to habitat alteration. In *Primates in fragments*. Springer, New York, NY: 199-211. ([https://doi.org/10.1007/978-1-4614-8839-2\\_14](https://doi.org/10.1007/978-1-4614-8839-2_14))

O'Keefe, J. and L. Nadel (1978). *The hippocampus as a cognitive map*, Oxford university press.

Potì, P., et al. (2005). "Landmark use by *Cebus apella*." *International Journal of Primatology* 26(4): 921-948. (<https://doi.org/10.1007/s10764-005-5330-6>)

Potì, P., et al. (2010). "Searching in the middle—Capuchins'(*Cebus apella*) and bonobos'(*Pan paniscus*) behavior during a spatial search task." *Journal of Experimental Psychology: Animal Behavior Processes* 36(1): 92. (<https://doi.org/10.1037/a0015970>)

Renouf, D. and L. Gaborko (1989). "Spatial and visual rule use by harbour seals (*Phoca vitulina*)." *Biology of Behaviour* 14(2): 169-181.

Robinson, M. H. (1985). "Predator-prey interactions, informational complexity, and the origins of intelligence." *Journal of the Washington Academy of Sciences*: 91-104.

Scholtyssek, C., et al. (2013). "A harbor seal can transfer the same/different concept to new stimulus dimensions." *Animal Cognition* 16(6): 915-925. (<https://doi.org/10.1007/s10071-013-0624-0>)

Schusterman, R. J. and T. Thomas (1966). "Shape discrimination and transfer in the California sea lion." *Psychonomic Science* 5(1): 21-22. (<https://doi.org/10.3758/BF03328259>)

Simms, N. K. and D. Gentner (2019). "Finding the middle: Spatial language and spatial reasoning." *Cognitive Development* 50: 177-194. (<https://doi.org/10.1016/j.cogdev.2019.04.002>)

Spetch, M. L., et al. (1996). "Learning the configuration of a landmark array: I. Touch-screen studies with pigeons and humans." *Journal of Comparative Psychology* 110(1): 55. (<https://doi.org/10.1037/0735-7036.110.1.55>)

Spetch, M. L., et al. (1997). "Use of landmark configuration in pigeons and humans: II. Generality across search tasks." *Journal of Comparative Psychology* 111(1): 14. (<https://doi.org/10.1037/0735-7036.111.1.14>)

Spetch, M. L., et al. (2003). "Searching by rules: Pigeons'(*Columba livia*) landmark-based search according to constant bearing or constant distance." *Journal of Comparative Psychology* 117(2): 123. (<https://doi.org/10.1037/0735-7036.117.2.123>)

Stich, K. P., et al. (2003). "Mental rotation of perspective stimuli in a California sea lion (*Zalophus californianus*)." *Brain, Behavior and Evolution* 61(2): 102-112. (<https://doi.org/10.1159/000069355>)

Sturz, B. R. and J. S. Katz (2009). "Learning of absolute and relative distance and direction from discrete visual landmarks by pigeons (*Columba livia*)." *Journal of Comparative Psychology* 123(1): 90. (<https://doi.org/10.1037/a0012905>)

Tolman, E. C. (1948). "Cognitive maps in rats and men." *Psychological review* 55(4): 189. (<https://doi.org/10.1037/h0061626>)

## Figures and Table

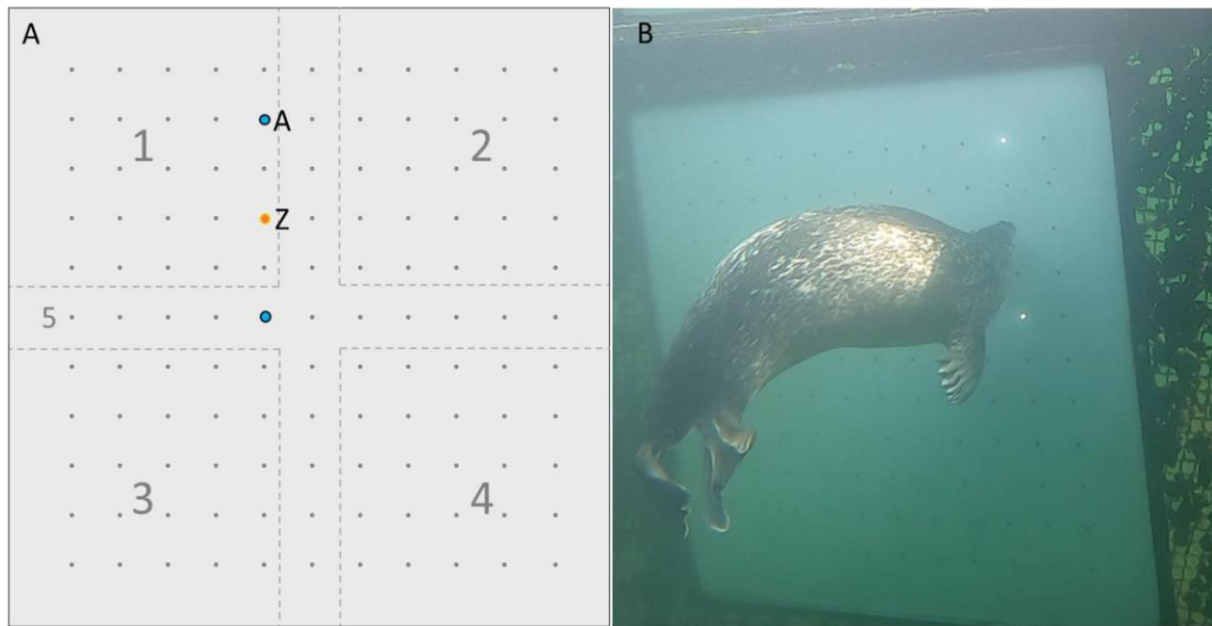

Fig. 1. A Experimental setup from the seal's point of view. On a plastic foam wall, we fixed 121 LED-lights. In every trial, two LEDs (blue dots) were lit and served as two-LED landmark array (A). The distance between the landmarks was altered in the different stages of training and during testing. The task of the animal was to touch an unlit LED, the goal, in the middle of the two landmarks (Z; for representation, this unlit LED is here marked by a yellow dot, however, during the experiment, Z remained unmarked). The position of the array was shifted to all quadrants (1-4) and the overlap area (5); see text for details. B shows a typical response behaviour of the seal when presented with the 3LEDv-configuration of the experiment in the training phase.

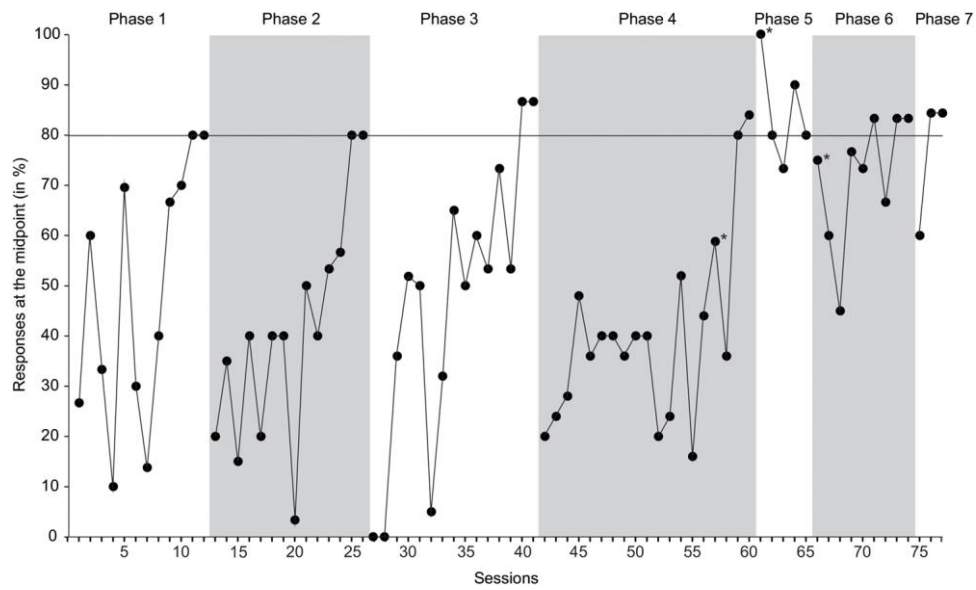

Fig. 2. Learning curve of the training phase of the experiment. Shown are the percentages of responses at the midpoint for each session during training phases 1-7. Each session was composed of 20-30 trials. The black line indicates the learning criterion that the animal had to reach which was defined as a performance of  $\geq 80\%$  correct response at the midpoint in two consecutive sessions. In session 57, 61 and 66 (see asterisks), the sessions had to be terminated before performing at least 20 trials due to poor motivation of the animal (session 57) or due to weather conditions and turbidity hindering a normal experimental procedure (sessions 61 and 66).



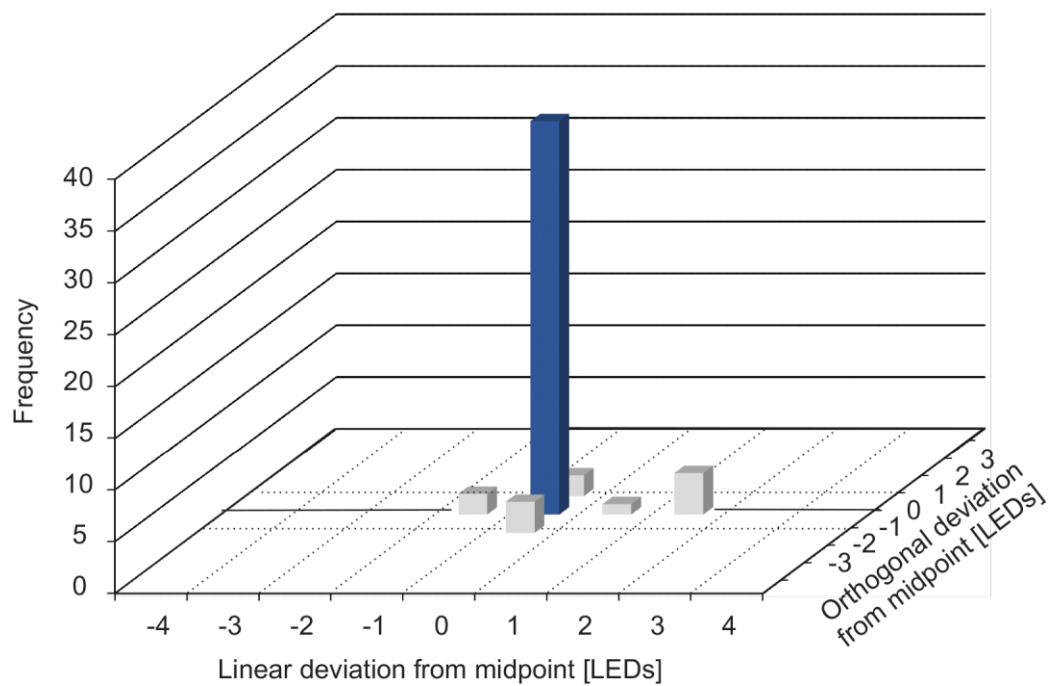

Fig. 3. The seal's search behaviour summarized for all test trials (N = 50) over all two-LED landmark array configurations. The absolute frequency of responses at a specific position relative to the midpoint (at the origin of the coordinate system) is depicted. To depict the error in deviation from the midpoint for all configurations in one graph irrespective of absolute orientation on the panel, the absolute orientation of the landmark array, either vertical or horizontal, was neglected, and errors for both landmark array orientation were plotted as if the landmark array had always been horizontal. The line on which the landmarks of the two-LED landmark array were positioned is indicated by the black line. For a more detailed depiction see Appendix (Supplement Fig. 3).

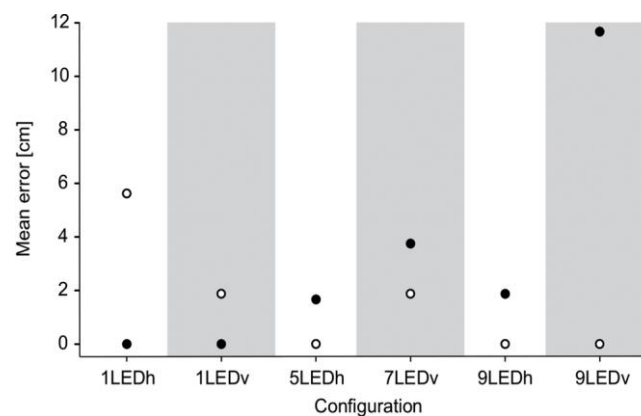

Fig. 4. Mean linear (filled dots) as well as orthogonal errors (open dots) for each configuration presented in the testing phase in cm (please note that the distance between two LEDs on the LED panel was 15cm). The errors occurring as a response to vertical configurations are highlighted with grey background. Each datapoint represents the average error of eight or nine presentations (see Methods for details).

Table 1. Overview of all stages of training and testing. Displayed are the specific configurations shown to the seal including the orientation of the two-LED landmark array (either vertical or horizontal) and the distance between the two LEDs of the two-LED landmark arrays (in cm) as well as the performance of the seal in the very first trial of presentation of the LED landmark configuration or in the first trial after reintroduction (see 3LEDv in training stage 6, and 5LEDv in training stage 7; C = correct meaning response at midpoint, IC = incorrect meaning response not at midpoint, hyphen = the configuration had already been tested in the directly proceeding training stage), the trials the animal needed to reach the learning criterion (LC) in the training phase and the numbers of trials each configuration was tested during the testing phase.

| Phase       | Stage   | Landmark Configuration | Inter-landmark distance [cm] | Orientation | Performance in first trial | Trials to LC in Stage 1-7 | Times tested in testing phase |
|-------------|---------|------------------------|------------------------------|-------------|----------------------------|---------------------------|-------------------------------|
| Training    | 1       | 3LEDv                  | 60                           | Vertical    | IC                         | 337                       |                               |
|             | 2       | 5LEDv                  | 90                           | Vertical    | IC                         | 340                       |                               |
|             | 3       | 3LEDh                  | 60                           | Horizontal  | IC                         | 372                       |                               |
|             | 4       | 7LEDh                  | 120                          | Horizontal  | IC                         | 467                       |                               |
|             | 5       | 3LEDh                  | 60                           | Horizontal  | C                          | 130                       |                               |
|             |         | 7LEDh                  | 120                          | Horizontal  | -                          |                           |                               |
|             | 6       | 3LEDh                  | 60                           | Horizontal  | -                          | 232                       |                               |
|             |         | 7LEDh                  | 120                          | Horizontal  | -                          |                           |                               |
|             |         | 3LEDv                  | 60                           | Vertical    | C                          |                           |                               |
|             | 7       | 3LEDh                  | 60                           | Horizontal  | -                          | 84                        |                               |
|             |         | 7LEDh                  | 120                          | Horizontal  | -                          |                           |                               |
|             |         | 3LEDv                  | 60                           | Vertical    | -                          |                           |                               |
|             |         | 5LEDv                  | 90                           | Vertical    | IC                         |                           |                               |
|             | Testing | Baseline Trials        | 3LEDh                        | 60          | Horizontal                 | -                         |                               |
| 7LEDh       |         |                        | 120                          | Horizontal  | -                          | 130                       |                               |
| 3LEDv       |         |                        | 60                           | Vertical    | -                          | 130                       |                               |
| 5LEDv       |         |                        | 90                           | Vertical    | -                          | 130                       |                               |
| Test Trials |         |                        | 1LEDh                        | 30          | Horizontal                 | C                         | 8                             |
|             |         | 1LEDv                  | 30                           | Vertical    | C                          | 8                         |                               |
|             |         | 5LEDh                  | 90                           | Horizontal  | C                          | 9                         |                               |
|             |         | 7LEDv                  | 120                          | Vertical    | C                          | 8                         |                               |
|             |         | 9LEDh                  | 150                          | Horizontal  | C                          | 8                         |                               |
|             |         | 9LEDv                  | 150                          | Vertical    | C                          |                           | 9                             |

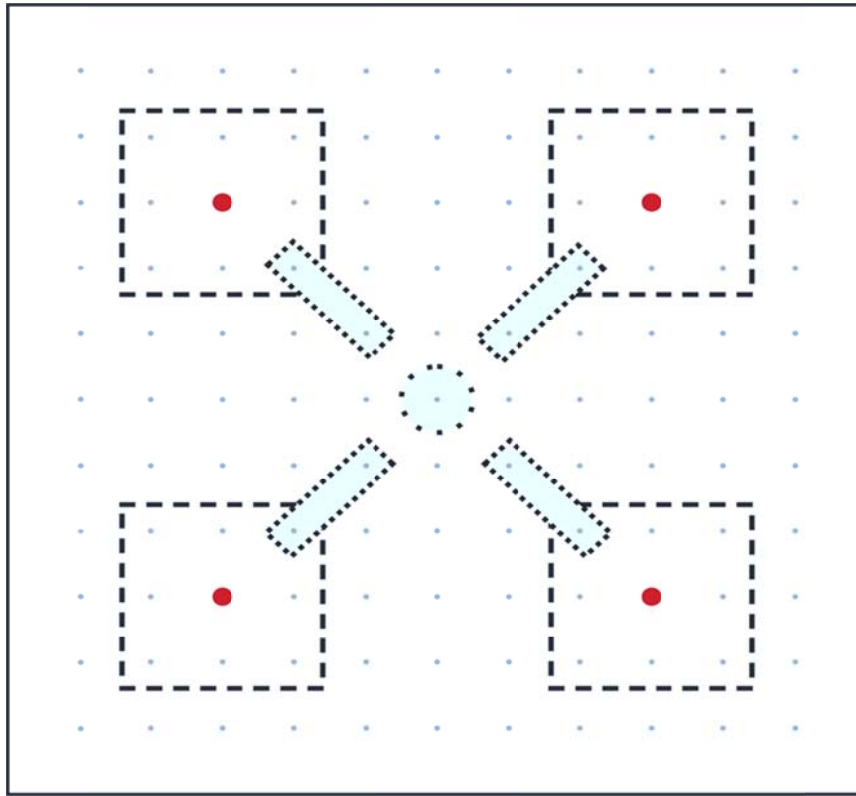

**Fig.S1.** Predicted search areas after expanding a landmark array consisting of four landmarks (red dots). The search areas in line with a beacon strategy (squared dashed line ), a rule-based strategy (dotted circle) and a directional vector strategy (dotted rectangles) are shown (modified after Marsh et al., 2011; Potì et al., 2010).

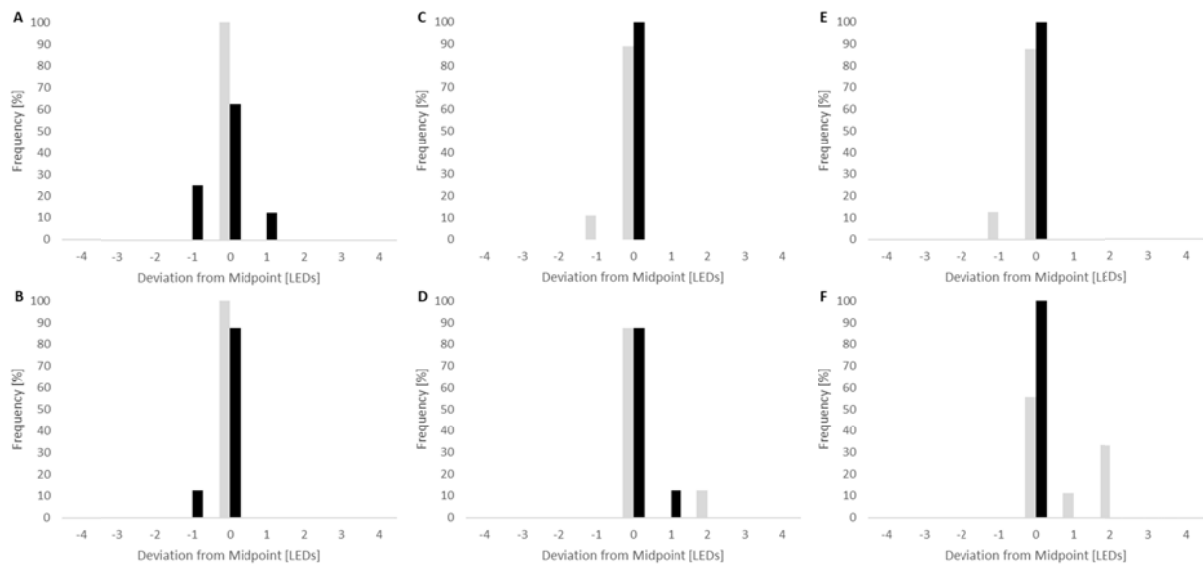

**Fig. S2.** Search behaviour of the seal during the test trials of the experiment for each configuration separately. A shows the 1LEDh configuration (N = 8), B the 1LEDv configuration (N = 8), C the 5LEDh configuration (N = 9), D the 7LEDv configuration (N = 8), E the 9LEDh configuration (N = 8) and F the 9LEDv configuration (N = 9). Depicted is the frequency [%] with which the seal chose the specific point along the linear (light grey bars) and the orthogonal (black bars) axis of the landmark configuration.

**Table S1.** Overview of the seal's search behaviour in the testing phase of the experiment during each test-trial (N=8-9). The responses of the seal are indicated as linear (L) and/or orthogonal (O) deviations from the midpoint in number of LEDs away from the midpoint. A response at the midpoint is indicated with 0. Deviations in linear direction (L) were defined as deviations occurring along the line connecting the two LEDs of the array, negative numbers show deviations to the left of the midpoint and positive numbers to the right of the midpoint in the horizontal configuration whereas for vertical configurations negative numbers are a deviation below the midpoint and positive numbers a deviation above the midpoint. Conversely, deviations in orthogonal direction (O) are defined as the seal's response occurring on the LED line(s) above (positive) or below (negative) the midpoint of the array in horizontal configurations and to the left (negative) and right (positive) in vertical configurations (see Method section).

| Testtrial # | Configurations |    |        |    |        |   |        |   |        |   |        |   |
|-------------|----------------|----|--------|----|--------|---|--------|---|--------|---|--------|---|
|             | 1 LEDh         |    | 1 LEDv |    | 5 LEDh |   | 7 LEDv |   | 9 LEDh |   | 9 LEDv |   |
|             | L              | O  | L      | O  | L      | O | L      | O | L      | O | L      | O |
| 1           | 0              | 0  | 0      | 0  | 0      | 0 | 0      | 0 | 0      | 0 | 0      | 0 |
| 2           | 0              | 1  | 0      | 0  | 0      | 0 | 0      | 0 | 0      | 0 | 0      | 0 |
| 3           | 0              | 0  | 0      | -1 | 0      | 0 | 0      | 1 | 1      | 0 | 1      | 0 |
| 4           | 0              | -1 | 0      | 0  | 0      | 0 | 0      | 0 | 0      | 0 | 0      | 0 |
| 5           | 0              | 0  | 0      | 0  | 0      | 0 | 0      | 0 | 0      | 0 | 0      | 0 |
| 6           | 0              | -1 | 0      | 0  | 0      | 0 | 0      | 0 | 0      | 0 | 2      | 0 |
| 7           | 0              | 0  | 0      | 0  | -1     | 0 | 0      | 0 | 0      | 0 | 2      | 0 |
| 8           | 0              | 0  | 0      | 0  | 0      | 0 | 2      | 0 | 0      | 0 | 2      | 0 |
| 9           |                |    |        |    | 0      | 0 |        |   |        |   | 0      | 0 |

**Table S2.** Overview of the results of the binomial general linear model. We calculated the effect of different fixed factors on the performance of the seal. The performance in every test trial was categorised as correct ("C", 1) or incorrect ("IC", 0). Fixed factors were the orientation (horizontal versus vertical), the inter-landmark distance (1LED, 3LEDs, 5LEDs, or 9LEDs), the degree of novelty of the LED landmark configuration (fully versus partially novel), and the two-way interaction between orientation and inter-landmark distance. Logistic regression for errors with orientation, inter-landmark distance and degree of novelty as fixed factors and the two-way interaction between inter-landmark distance and orientation

#### Model Summary - errors

| Model          | Deviance | AIC     | BIC     | df | $\chi^2$ | p      | McFadden<br>$R^2$ | Nagelkerke<br>$R^2$ | Tjur<br>$R^2$ | Cox & Snell<br>$R^2$ |
|----------------|----------|---------|---------|----|----------|--------|-------------------|---------------------|---------------|----------------------|
| H <sub>0</sub> | 55.1080  | 57.1080 | 59.0200 | 49 |          |        |                   |                     |               |                      |
| H <sub>1</sub> | 50.3492  | 60.3492 | 69.9093 | 45 | 4.7588   | 0.3130 | 0.0864            | 0.1359              | 0.0965        | 0.0908               |

#### Coefficients

|                                          | Estimate | Standard Error | z       | Wald Test         |        |        | 95% Confidence interval |                |
|------------------------------------------|----------|----------------|---------|-------------------|--------|--------|-------------------------|----------------|
|                                          |          |                |         | Wald<br>Statistic | d<br>f | p      | Lower<br>bound          | Upper<br>bound |
| (Intercept)                              | -0.3686  | 0.8253         | -0.4466 | 0.1994            | 1      | 0.6552 | -1.9860                 | 1.2489         |
| Inter-landmark distance                  | -0.1860  | 0.1640         | -1.1343 | 1.2866            | 1      | 0.2567 | -0.5074                 | 0.1354         |
| Orientation (vertical vs horizontal)     | -1.7480  | 1.4167         | -1.2339 | 1.5225            | 1      | 0.2172 | -4.5247                 | 1.0286         |
| Degree of Novelty (partial vs fully)     | -0.6092  | 0.7732         | -0.7880 | 0.6209            | 1      | 0.4307 | -2.1247                 | 0.9062         |
| Inter-landmark distance *<br>Orientation | 0.4025   | 0.2255         | 1.7847  | 3.1852            | 1      | 0.0743 | -0.0395                 | 0.8445         |

Note. errors level '1' coded as class 1.

The above model is not statistically significantly better than a model without the two-way interaction,  $\chi^2(1,45) = 3.653$ ,  $p = .056$ , a model having only inter-landmark distance as fixed factor,  $\chi^2(1,45) = 4.656$ ,  $p = 0.199$ ; having only orientation as fixed factor,  $\chi^2(1,45) = 4.319$ ,  $p = 0.23$ ; having only the factor degree of novelty as fixed factor,  $\chi^2(1,45) = 4.168$ ,  $p = 0.244$ ; having inter-landmark distance and degree of novelty as fixed factors,  $\chi^2(1,45) = 4.011$ ,  $p = 0.135$ ; having orientation and inter-landmark distance as fixed factors,  $\chi^2(1,45) = 4.26$ ,  $p = 0.119$ ; or having orientation and degree of novelty as fixed factors,  $\chi^2(1,45) = 3.764$ ,  $p = 0.152$ .

**Table S3.** Overview of the results for the GLM (repeated measurement ANOVA) with absolute size of the error as outcome and types of errors (linear or orthogonal), inter-landmark distance and orientation as fixed factors. Note that hypothetically the seal could make both types of errors in a single trial (but he did not).

#### Within Subjects Effects

| Cases                                | Sum of Squares | df | Mean Square | F      | p      | $\eta^2$ |
|--------------------------------------|----------------|----|-------------|--------|--------|----------|
| error type (linear or orthogonal)    | 0.6988         | 1  | 0.6988      | 3.5747 | 0.0648 | 0.0325   |
| error type * Orientation             | 0.3996         | 1  | 0.3996      | 2.0440 | 0.1594 | 0.0186   |
| error type * Inter-landmark distance | 1.8119         | 1  | 1.8119      | 9.2685 | 0.0038 | 0.0844   |
| Residuals                            | 9.1881         | 47 | 0.1955      |        |        |          |

Note. Type III Sum of Squares

#### Between Subjects Effects

| Cases       | Sum of Squares | df | Mean Square | F      | p      | $\eta^2$ |
|-------------|----------------|----|-------------|--------|--------|----------|
| orientation | 0.2997         | 1  | 0.2997      | 1.5792 | 0.2151 | 0.0140   |
| magnitude   | 0.1601         | 1  | 0.1601      | 0.8438 | 0.3630 | 0.0075   |
| Residuals   | 8.9199         | 47 | 0.1898      |        |        |          |

Note. Type III Sum of Squares
